# Supplementary material for: Hydrothermal synthesis of caterpillar-like one-dimensional NiCO3 nanosheet arrays and primary lithium battery application
Source: Royal Society of Chemistry journal article supplement (doi:10.1039/d2dt00091a), 2022-01-01
Supplement: d2dt00091a1.pdf [file d2dt00091a1.pdf]

### Supporting Information

## Hydrothermal synthesis of caterpillar-like one-dimensional NiCO<sub>3</sub> nanosheet arrays and primary lithium battery application

Cuixia Cheng<sup>a, b\*</sup>, Fang Chen<sup>a</sup>, Yinfang Cheng<sup>a</sup>, Guosong Lai<sup>a</sup>

<sup>a</sup> Hubei Key Laboratory of Pollutant Analysis & Reuse Technology, College of Chemistry and Chemical Engineering, Hubei Normal University, Huangshi 435002, Hubei, P. R. China

<sup>b</sup> Voiland School of Chemical Engineering & Bioengineering, Washington State University, 2710 Crimson Way, Richland, Washington 99354, United States

### Equations S1-2:

$$i_0 = A \exp(-E_a/RT) \quad (1)$$

$$i_0 = RT/nFR_{ct} \quad (2)$$

where  $i_0$ ,  $A$ ,  $E_a$ ,  $R$ ,  $T$ ,  $n$ ,  $F$  are the exchange current, the temperature-independent coefficient, the active energy, the gas constant, the absolute temperature, the number of transferred electrons and the Faraday constant, respectively.

### Equations S3-4:

$$D_{Li^+} = (RT)^2/(2A^2n^4F^4C^2\sigma^2) \quad (3)$$

$$Z' = \sigma\omega^{-1/2} + R_s + R_{ct} \quad (4)$$

where  $A$  is the surface area of the electrode (here  $A = 0.64 \text{ cm}^2$ ),  $C$  is the molar concentration of  $Li^+$  in the  $NiCO_3$  sample,  $n$  is the number of reacting electrons,  $\sigma$  is Warburg factor.

---

\* Corresponding author Tel/Fax: +86 7146515602  
E-mail address: Chengcx@hbnu.edu.cn

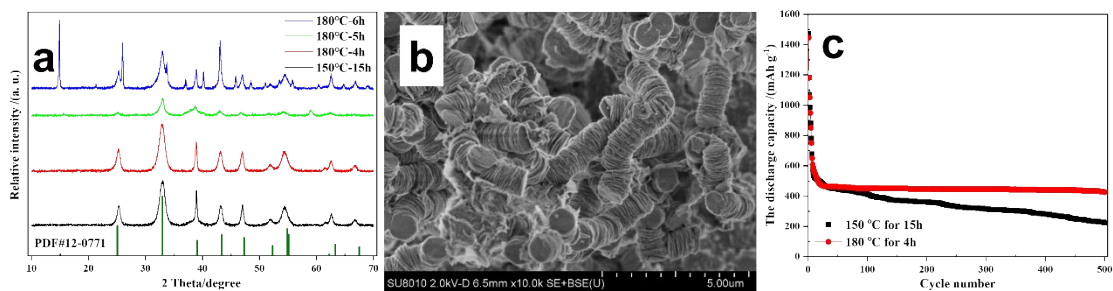

**Fig. S1** (a) XRD patterns for the powders obtained under different conditions. (b) SEM for the sample heated at 150 °C for 15 h. (c) Cycle performance at 1.0 A g<sup>-1</sup> for both NiCO<sub>3</sub> samples

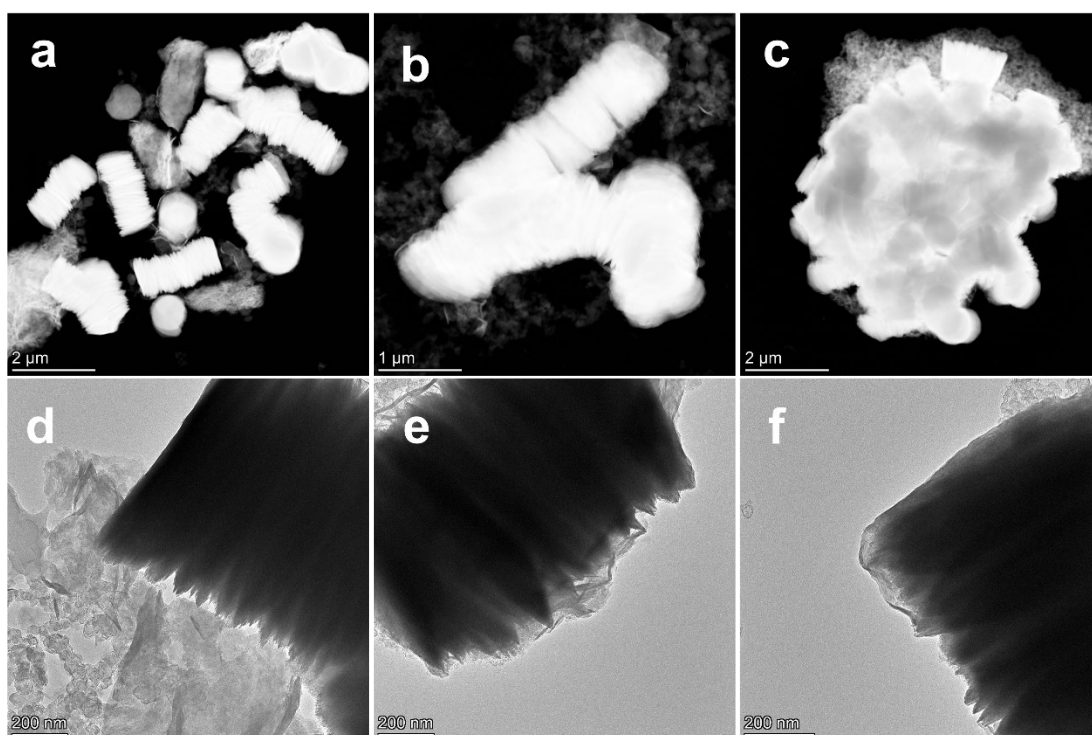

**Fig. S2** The work electrode composed of NiCO<sub>3</sub> heated at 180 °C for 4 h: SEM (a) before adding electrolyte, (b) after adding electrolyte, (c) after cycles; TEM (d) before adding electrolyte, (e) after adding electrolyte, (f) after cycles

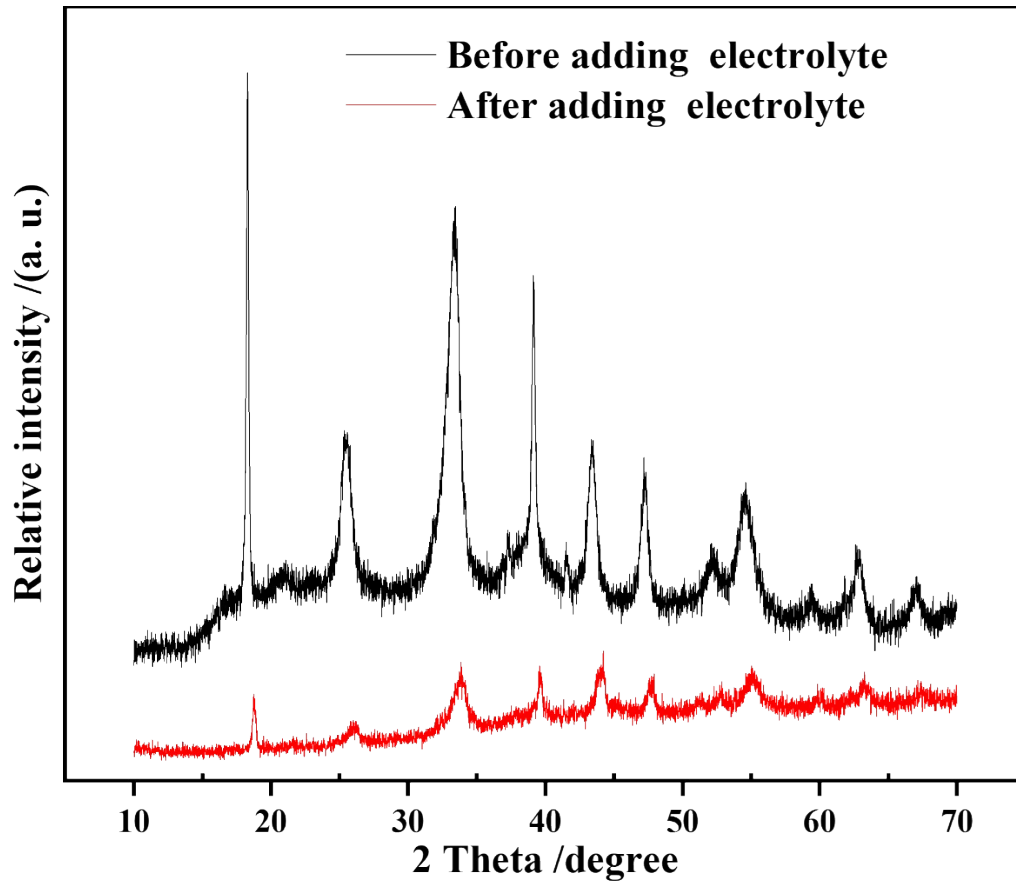

**Fig. S3** XRD patterns before/after adding electrolyte for the work electrode composed of  $\text{NiCO}_3$  heated at  $180\text{ }^\circ\text{C}$  for 4 h
